# Supplementary material for: High-dose rapamycin exerts a temporary impact on T. reesei RUT-C30 through gene trFKBP12
Source: Biotechnol Biofuels. 2021 Mar 26;14:77. doi: 10.1186/s13068-021-01926-w (PMC8004424; doi:10.1186/s13068-021-01926-w)
Supplement: Supplementary file 7 — Additional file 7: Table S4. Transcriptional level of DEGs related to “Biosynthesis of secondary metabolites” in T. reesei RUT-C30. [file 13068_2021_1926_MOESM7_ESM.xlsx]

## Sheet: Sheet1
GeneID	GeneName	C30 FPKM	C30 rapa FPKM	logFC	pval	Regulation	Description	GO_BP	GO_CC	GO_MF	KO
gene1521	M419DRAFT_95607	55.46	179.955	1.65607	1.54231e-63	Ups	acetyl-CoA acetyltransferase	GO:0006635:fatty acid beta-oxidation;	GO:0005739:mitochondrion;	GO:0003985:acetyl-CoA C-acetyltransferase activity;GO:0003988:acetyl-CoA C-acyltransferase activity;GO:0046872:metal ion binding;	K00626
gene3563	M419DRAFT_136748	64.43	136.175	1.03685	2.88356e-48	Ups	oxidosqualene:lanosterol cyclase	GO:0006694:steroid biosynthetic process;	-	GO:0000250:lanosterol synthase activity;	K01852
gene1871	M419DRAFT_127428	17.615	50.46	1.4751	1.97858e-46	Ups	Thiamin diphosphate-binding protein	-	-	-	K00166
gene1542	M419DRAFT_72207	130.115	276.34	1.04379	3.69067e-41	Ups	enoyl-CoA hydratase	GO:0006635:fatty acid beta-oxidation;	GO:0005759:mitochondrial matrix;GO:0005739:mitochondrion;	GO:0004300:enoyl-CoA hydratase activity;	K07511
gene6023	M419DRAFT_137904	33.25	70.18	1.03489	1.05285e-32	Ups	2-oxoisovalerate dehydrogenase beta subunit precursor	GO:0009083:branched-chain amino acid catabolic process;	GO:0005947:mitochondrial alpha-ketoglutarate dehydrogenase complex;	GO:0003863:3-methyl-2-oxobutanoate dehydrogenase (2-methylpropanoyl-transferring) activity;	K00167
gene1999	M419DRAFT_107864	12.58	30.955	1.25625	1.30706e-24	Ups	2-oxoacid dehydrogenase acyltransferase	-	-	-	K09699
gene8571	M419DRAFT_89810	7.69	16.48	1.05528	1.32196e-08	Ups	mitochondrial triosephosphate isomerase	-	-	-	K01803
gene9577	M419DRAFT_92414	2.105	4.88	1.16396	2.3298e-06	Ups	3-isopropylmalate dehydrogenase	GO:0009098:leucine biosynthetic process;	GO:0005737:cytoplasm;	GO:0003862:3-isopropylmalate dehydrogenase activity;GO:0000287:magnesium ion binding;GO:0051287:NAD binding;	K00052
gene8570	M419DRAFT_38814	0	1.09	6.21885	2.81738e-05	Ups	ribose-5-phosphate isomerase	GO:0016052:carbohydrate catabolic process;GO:0009758:carbohydrate utilization;GO:0071322:cellular response to carbohydrate stimulus;	-	GO:0016861:intramolecular oxidoreductase activity, interconverting aldoses and ketoses;	K01808
gene9551	M419DRAFT_39633	0.07	0.465	2.61788	0.000423614	Ups	catalase-domain-containing protein	-	-	-	K03781
gene7396	M419DRAFT_132693	0.73	1.525	1.01284	0.00908228	Ups	GroES-like protein	-	-	-	K13953
